# Supplementary material for: Activation of the Ion Channel TRPV4 Induces Epithelial to Mesenchymal Transition in Breast Cancer Cells
Source: PubMed Central journal article supplement (PMC7764818; doi:10.3390/ijms21249417), 2020-12-10
Supplement: ijms-21-09417-s001.pdf [file ijms-21-09417-s001.pdf]

# Activation of the ion channel TRPV4 induces epithelial to mesenchymal transition in breast cancer cells

Iman Azimi, Mélanie Robitaille, Kaela Armitage, Choon Leng So, Michael Milevskiy, Korinne Northwood, Huai Fang Lim, Erik W Thompson, Sarah Roberts-Thomson, Gregory Monteith

## Supplemental material

Table S1. Top 100 most interconnected genes of the Red Module.

| Gene     | kTotal   | kWithin  | kOut     | kDiff    |
|----------|----------|----------|----------|----------|
| ROPN1    | 2.665705 | 2.422587 | 0.243117 | 2.17947  |
| FOXC1    | 3.021773 | 2.154989 | 0.866784 | 1.288205 |
| ANXA8    | 1.986219 | 1.976218 | 0.010001 | 1.966217 |
| CCDC82   | 2.621327 | 1.87143  | 0.749897 | 1.121534 |
| ANXA8L2  | 1.73774  | 1.726229 | 0.011511 | 1.714718 |
| KRT5     | 1.705635 | 1.659191 | 0.046444 | 1.612747 |
| MAML2    | 2.101074 | 1.643174 | 0.4579   | 1.185274 |
| KRT6B    | 1.643053 | 1.636257 | 0.006796 | 1.629461 |
| KRT17    | 1.641288 | 1.612715 | 0.028573 | 1.584142 |
| DSC3     | 1.578761 | 1.543334 | 0.035427 | 1.507906 |
| SFRP1    | 1.672026 | 1.534475 | 0.137551 | 1.396923 |
| FAM126A  | 2.247748 | 1.530447 | 0.717301 | 0.813146 |
| PLEKHG1  | 2.134668 | 1.4686   | 0.666068 | 0.802532 |
| FAM171A1 | 1.735645 | 1.395844 | 0.339801 | 1.056043 |
| SFRS13B  | 2.068389 | 1.352625 | 0.715764 | 0.636861 |
| ROPN1B   | 1.417966 | 1.337803 | 0.080163 | 1.257639 |
| HAPLN3   | 2.567416 | 1.328238 | 1.239178 | 0.08906  |
| KRT14    | 1.404378 | 1.314709 | 0.08967  | 1.225039 |
| MRAS     | 1.611315 | 1.290898 | 0.320417 | 0.970481 |
| KLK7     | 1.284678 | 1.274158 | 0.01052  | 1.263638 |
| VGLL1    | 1.902127 | 1.264776 | 0.637351 | 0.627425 |
| RGMA     | 1.463472 | 1.25475  | 0.208721 | 1.046029 |
| STAC     | 1.694877 | 1.232201 | 0.462675 | 0.769526 |
| MIA      | 1.266602 | 1.232099 | 0.034503 | 1.197596 |
| GABRP    | 1.281528 | 1.223896 | 0.057632 | 1.166264 |
| KLK6     | 1.179502 | 1.164228 | 0.015274 | 1.148954 |

|          |          |          |          |          |
|----------|----------|----------|----------|----------|
| BCL11A   | 1.46638  | 1.1067   | 0.35968  | 0.74702  |
| EGFR     | 1.334853 | 1.04141  | 0.293443 | 0.747967 |
| B3GNT5   | 1.76232  | 1.032807 | 0.729513 | 0.303294 |
| SOX10    | 1.105534 | 1.026404 | 0.07913  | 0.947273 |
| CHST3    | 1.267812 | 1.01297  | 0.254842 | 0.758127 |
| ACSL4    | 2.248714 | 1.00454  | 1.244174 | -0.23963 |
| DSG3     | 0.999424 | 0.989233 | 0.010191 | 0.979043 |
| PPP1R14C | 1.27081  | 0.959646 | 0.311164 | 0.648483 |
| DZIP1    | 1.682704 | 0.930192 | 0.752512 | 0.17768  |
| FAT2     | 1.082889 | 0.929626 | 0.153263 | 0.776363 |
| ANXA1    | 1.374404 | 0.911523 | 0.462882 | 0.448641 |
| KLK5     | 0.894596 | 0.883393 | 0.011203 | 0.872191 |
| FAM49A   | 1.69676  | 0.820864 | 0.875897 | -0.05503 |
| TRIM29   | 0.825988 | 0.804831 | 0.021157 | 0.783674 |
| MFGE8    | 0.983043 | 0.789784 | 0.193259 | 0.596525 |
| MSN      | 1.650027 | 0.784187 | 0.86584  | -0.08165 |
| CLCN4    | 1.155642 | 0.7801   | 0.375542 | 0.404559 |
| GLIPR2   | 1.573334 | 0.766479 | 0.806855 | -0.04038 |
| ART3     | 1.893752 | 0.750881 | 1.142871 | -0.39199 |
| KLK8     | 0.745361 | 0.733792 | 0.011569 | 0.722224 |
| PLAGL1   | 1.12737  | 0.72682  | 0.400549 | 0.326271 |
| MID1     | 0.923478 | 0.710744 | 0.212733 | 0.498011 |
| MOBKL2B  | 0.858304 | 0.703438 | 0.154866 | 0.548572 |
| KRT16    | 0.765016 | 0.695234 | 0.069782 | 0.625452 |
| OCA2     | 1.009394 | 0.676128 | 0.333266 | 0.342862 |
| FMNL2    | 1.458647 | 0.672312 | 0.786335 | -0.11402 |
| PTX3     | 0.770324 | 0.66488  | 0.105444 | 0.559436 |
| KRT6C    | 0.676489 | 0.664285 | 0.012204 | 0.652081 |
| PRNP     | 0.802234 | 0.65275  | 0.149484 | 0.503266 |
| MAP7D3   | 0.986342 | 0.608434 | 0.377907 | 0.230527 |
| CNTNAP3  | 0.687036 | 0.600736 | 0.0863   | 0.514437 |
| CRYAB    | 0.672368 | 0.592552 | 0.079815 | 0.512737 |
| ARL4C    | 1.268734 | 0.584872 | 0.683861 | -0.09899 |
| ST8SIA1  | 0.919932 | 0.58117  | 0.338762 | 0.242408 |
| RBMS1    | 0.895559 | 0.570014 | 0.325545 | 0.244468 |
| QKI      | 0.992983 | 0.564889 | 0.428093 | 0.136796 |
| SAA2     | 0.596563 | 0.56342  | 0.033143 | 0.530276 |
| CSDA     | 0.633992 | 0.563419 | 0.070573 | 0.492847 |

|          |          |          |          |          |
|----------|----------|----------|----------|----------|
| BBOX1    | 0.598402 | 0.562301 | 0.036101 | 0.5262   |
| EPHB1    | 0.623708 | 0.553694 | 0.070014 | 0.48368  |
| FERMT1   | 0.569548 | 0.538114 | 0.031434 | 0.50668  |
| SAA1     | 0.606084 | 0.53795  | 0.068134 | 0.469816 |
| GPM6B    | 0.598787 | 0.536228 | 0.062559 | 0.473669 |
| CSDAP1   | 0.585596 | 0.534531 | 0.051064 | 0.483467 |
| SPRR2A   | 0.534671 | 0.533892 | 0.000779 | 0.533113 |
| ZNF454   | 0.641807 | 0.528185 | 0.113622 | 0.414563 |
| TTYH1    | 0.567384 | 0.52632  | 0.041064 | 0.485256 |
| C9orf170 | 0.792361 | 0.515967 | 0.276394 | 0.239574 |
| RASGEF1C | 0.678879 | 0.514674 | 0.164204 | 0.35047  |
| SPRR2D   | 0.512369 | 0.512051 | 0.000318 | 0.511733 |
| DMD      | 0.694321 | 0.503953 | 0.190368 | 0.313585 |
| IL34     | 0.645401 | 0.487783 | 0.157618 | 0.330165 |
| PLA2G4A  | 0.640522 | 0.482759 | 0.157763 | 0.324997 |
| LEMD1    | 0.816112 | 0.481845 | 0.334267 | 0.147577 |
| UGT8     | 0.598597 | 0.463255 | 0.135341 | 0.327914 |
| WWTR1    | 0.64414  | 0.461808 | 0.182332 | 0.279475 |
| BOC      | 0.627433 | 0.459281 | 0.168152 | 0.291129 |
| ROR1     | 1.033942 | 0.457598 | 0.576344 | -0.11875 |
| FSCN1    | 0.889122 | 0.448502 | 0.44062  | 0.007882 |
| SIRPA    | 1.107469 | 0.447571 | 0.659898 | -0.21233 |
| SOX8     | 0.499786 | 0.444639 | 0.055147 | 0.389493 |
| CHST2    | 1.087465 | 0.436692 | 0.650773 | -0.21408 |
| AGPAT4   | 0.782968 | 0.436565 | 0.346403 | 0.090162 |
| SERPINB5 | 0.441897 | 0.43599  | 0.005908 | 0.430082 |
| MPP6     | 0.736232 | 0.428021 | 0.308211 | 0.11981  |
| CARD6    | 1.348641 | 0.426075 | 0.922566 | -0.49649 |
| DLX6     | 0.463047 | 0.425212 | 0.037835 | 0.387377 |
| CHODL    | 0.835284 | 0.423291 | 0.411993 | 0.011298 |
| FZD9     | 1.009899 | 0.418499 | 0.5914   | -0.1729  |
| PTCHD1   | 0.525988 | 0.4175   | 0.108487 | 0.309013 |
| PSAT1    | 1.352388 | 0.405541 | 0.946848 | -0.54131 |
| C17orf51 | 0.711313 | 0.404848 | 0.306465 | 0.098383 |
| TBX19    | 0.713067 | 0.402841 | 0.310225 | 0.092616 |
| KRT6A    | 0.406454 | 0.400453 | 0.006001 | 0.394452 |

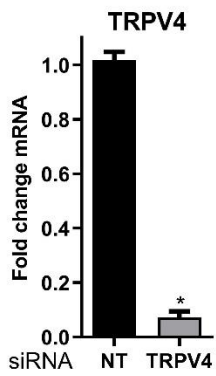

**Figure S1.** Confirmation of TRPV4 siRNA-mediated silencing. \*  $p < 0.0001$ , unpaired t-test.  $n = 3$ , mean  $\pm$  SD.

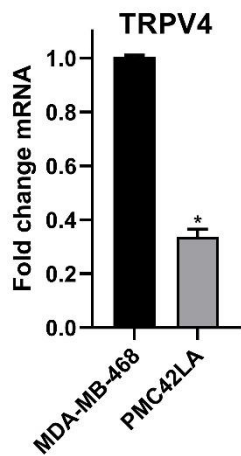

**Figure S2.** Comparison of TRPV4 mRNA levels in MDA-MB-468 and PMC42LA cells. \*  $p < 0.0001$ , unpaired t-test.  $n = 3$ , mean  $\pm$  SD.
